1 A global comparison of the nutritive values of forage plants grown in contrasting  
2 environments

3 Mark A. Lee

4 Natural Capital and Plant Health, Royal Botanic Gardens Kew, Richmond, TW9 3AB, UK

5 E: Mark A. Lee ([m.lee@kew.org](mailto:m.lee@kew.org))

6

7 **Abstract**

8 Forage plants are valuable because they maintain wild and domesticated herbivores, and sustain the delivery of  
9 meat, milk and other commodities. Forage plants contain different quantities of fibre, lignin, minerals and  
10 protein, and vary in the proportion of their tissue that can be digested by herbivores. These nutritive components  
11 are important determinants of consumer growth rates, reproductive success and behaviour. A dataset was  
12 compiled to quantify variation in forage plant nutritive values within- and between-plant species, and to assess  
13 variation between plant functional groups and bioclimatic zones. 1,255 geo-located records containing 3,774  
14 measurements of nutritive values for 136 forage plant species grown in 30 countries were obtained from  
15 published articles. Spatial variability in forage nutritive values indicated that climate modified plant nutritive  
16 values. Forage plants grown in arid and equatorial regions generally contained less digestible material than those  
17 grown in temperate and tundra regions; containing more fibre and lignin, and less protein. These patterns may  
18 reveal why herbivore body sizes, digestion and migration strategies are different in warmer and drier regions.  
19 This dataset also revealed the capacity for variation in the nutrition provided by forage plants. The proportion of  
20 the plant tissue that was digestible ranged between species from 2-91%. The amount of fibre contained within  
21 plant material ranged by 23-90%, protein by 2-36%, lignin by 1-21% and minerals by 2-22%. Water contents  
22 also varied substantially; ranging from 3-89% of standing biomass. On average, grasses and tree foliage  
23 contained the most fibre, whilst herbaceous legumes contained the most protein and tree foliage contained the  
24 most lignin. However, there were individual species within each functional group that were highly nutritious.  
25 This dataset may be used to identify forage plant species with useful traits which can be cultivated to enhance  
26 livestock productivity and inform wild herbivore conservation strategies.

27

28 Keywords: fibre, digestibility, grasses, herbivores, legumes, protein.

29

## 30 **Introduction**

31 Forage plants provide humans with valuable ecosystem services, for example, they feed an estimated 1.5 billion  
32 cattle, 1.2 billion sheep, 1 billion goats and 0.2 billion buffalo around the world – supplying meat, milk and  
33 other commodities (FAOSTAT 2016). These livestock are a global asset, worth around \$1.4 trillion to the global  
34 economy, and livestock farming employs around 1.3 billion people, directly supporting over 600 million  
35 smallholder farmers (Thornton et al. 2011). Wild herbivores also feed on forage plants and therefore these plants  
36 contribute to the maintenance of biodiversity, to the complexity of biotic interactions and to the magnitude and  
37 direction of the associated ecosystem processes and services (Millennium Ecosystem Assessment 2005).

38 Plants vary in the quantities of different nutritive components that they deliver to consumers. They can vary in  
39 the amounts of fat, protein, carbohydrate, fibre and other micro-nutrients that are present in tissues. Herbivores  
40 vary in their requirements for these different nutritive components, and their dietary requirements change over  
41 time (Simpson et al. 2004). Forage plants also vary in their palatability, with defensive or structural compounds  
42 such as lignin and fibrous compounds reducing the amount of plant material that herbivores can digest (Distel et  
43 al. 2005). To reflect these different nutritive components, there are several agronomic metrics of forage nutritive  
44 quality. Metrics range from the quantification of forage dry matter content (DM: the proportion of plant material  
45 remaining after drying) to the assessment of forage digestibility (an integrative value estimating the proportion  
46 of plant material which can be digested by herbivores) (Gardarin et al. 2014; Beecher et al. 2015). Multiple  
47 nutritive metrics may be considered together to estimate the value of forage species or varieties to livestock and  
48 wild herbivores, and to project future milk or meat yields (Dong et al. 2003; Jégo et al. 2013). An understanding  
49 of the nutritive value of plants has been used to guide ecosystem management strategies, including forage  
50 species selection (Cherney and Cherney 1997; Delaby and Peyraud 2009).

51 Foraging theory links the diets of herbivores to their fitness, providing insights into patch selection, consumer  
52 population sizes and animal movements (Pyke 1984). Larger patch areas and enhanced plant biomass production  
53 have been positively correlated with consumer persistence, population sizes, and has been negatively correlated  
54 with rates of extinction (Hanski and Thomas 1994; Schlinkert et al. 2016). However, the quality and palatability  
55 of forage plants also affects the amount of vegetation that is consumed, rates of animal bodyweight gains and  
56 reproductive success (Herrero et al. 2015). The nutritive value of forage plants determines optimal herbivore  
57 body sizes, the relative success of ruminants and non-ruminants, and migration strategies (Bailey et al. 1996).  
58 The paucity of data quantifying the nutritive value of different forage plants grown across different locations  
59 means that nutrition is rarely considered as a part of ecological or conservation studies (Pontes et al. 2007).

60 Plant species composition determines the nutritional quality of semi-natural grasslands (French 2017), alpine  
61 grasslands (Komac et al. 2014) and pasture (Chapman et al. 2014). Herbivores can consume herbaceous  
62 legumes and non-legumes, as well as the foliage of shrubs and trees (Wood et al. 2015). There is emerging  
63 evidence that there is variation in the nutritive values of plant functional groups. Herbaceous legumes may  
64 deliver greater quantities of protein and grasses may be more readily digestible (Weller and Cooper 2001; King  
65 et al. 2012). The extent by which forage plants from different functional groups can vary in their nutritive value  
66 and palatability has not been comprehensively assessed at the global scale. In a previous study focussing solely  
67 on grasses, Lee et al. (2017) demonstrated that the fibre and protein contents of forage grasses (55 species from  
68 16 countries) ranged from 34-90% and from 5-36%, respectively. Incomplete data coverage means that  
69 comparisons between the nutritive values of forage plants grown in different regions have also not been fully  
70 quantified, although there is evidence that warmer regions are associated with lower quality forage grasses,  
71 containing higher proportions of fibre, which are generally tougher to digest (Lee et al. 2017).

72 To further extend data coverage, and to investigate the variation between functional groups and regions a new  
73 study was undertaken, and is presented here. Two main hypotheses were tested; firstly, that there would be  
74 considerable variation between species and functional groups, such as greater protein content in leguminous  
75 herbaceous plants and greater lignin content in the foliage of trees. The second hypothesis was that forage plants  
76 grown in hotter and drier regions would be of lower nutritive quality than those grown in cooler and wetter  
77 regions, containing higher proportions of fibre and lignin, lower proportions of protein and thus would be  
78 associated with lower digestibility values. To test these hypotheses, a large geo-referenced database of forage  
79 plants was compiled, which included a range of nutritive metrics. Nutritive metrics were compared within- and  
80 between-forage plant species and between functional groups and bioclimatic zones.

81 **Material and methods**

82 **Nutritive metrics**

83 The metrics that were chosen for inclusion in the database were the eight most commonly reported agronomic  
84 metrics in a pilot assessment of journal articles listed by the ISI Web of Knowledge (WoK;  
85 [www.wok.mimas.ac.uk](http://www.wok.mimas.ac.uk)). For consistency, values were included in the database if they were derived from  
86 laboratory analyses and based on the methods of Van Soest et al. (1991) or AOAC (2000). Mineral ash values  
87 represented the mineral component of the forage plants (hereafter termed ‘ash’: the inorganic mineral  
88 component remaining following burning). Two fibre metrics were included, representing: (1) the plants  
89 structural components termed acid detergent fibre (ADF: the material remaining after boiling in acid detergent,  
90 representing lignin, cellulose, silica and insoluble nitrogenous compounds but not hemicellulose); and (2)  
91 termed neutral detergent fibre (NDF: the material remaining after boiling in neutral detergent representing  
92 lignin, silica, cellulose and hemicellulose). Lignin was included when it was presented as acid detergent lignin  
93 (ADL: isolated by boiling in strong acid). Forage protein content was included in the dataset when presented as  
94 crude protein (CP: total nitrogen content as measured by Kjeldahl digestion multiplied by 6.25). The dry matter  
95 contents of the forage plants was also included (DM: the proportion of material remaining following drying).  
96 Two digestibility metrics were also included in the dataset, as integrated metrics estimating the proportion of  
97 forage that can be utilised by ruminants. Dry matter digestibility (DMD: the proportion of forage dry matter  
98 which can be digested) and organic matter digestibility (OMD: the proportion of forage organic matter which  
99 can be digested). Digestibility metrics were estimated using *in vitro*, *in vivo* and near infra-red (NIR) techniques.

100

101 **Data collection**

102 Data were obtained from peer-reviewed journal articles. These articles were identified by systematically  
103 searching the WoK. To avoid researcher bias and to maintain a consistent approach, the search terms used to  
104 identify the articles listed in the WoK were identified a priori. Articles were included in the database if the  
105 nutritive measurements were related to a specific forage plant species or hybrid that had been grown in field  
106 conditions at a defined location (hereafter termed ‘site’) and harvested for nutritional analyses at a stated time.  
107 Data from experiments conducted in greenhouses or field experiments, i.e. those that manipulated climatic  
108 variables, were excluded because the prevailing growing conditions were not representative of the location. All  
109 plant species names were checked for accuracy using an online list of species names, with synonyms switched  
110 to accepted names and unknown species were removed ([www.theplantlist.org](http://www.theplantlist.org)).

111 To ensure that the methods for measuring forage nutritive value were consistent across the articles, data were  
112 included if Ash, ADF, ADL, DM, NDF and/or CP analyses were carried out on dried samples and presented in  
113 units of  $\text{g kg}^{-1}$  DM or % DM. DMD and OMD was also recorded when available. All measurements that were  
114 taken at the same site and on the same sampling interval were allocated to the same row of the dataset, thus  
115 multiple nutritive metrics were included for the same time and location (mean nutritive metrics per row =  $3.01 \pm$   
116  $0.04$ ). Samples were included if they were analysed in the same form as they would be consumed by livestock;  
117 grasses, herbaceous non-legumes (hereafter termed ‘herbs’) and herbaceous legumes (hereafter termed  
118 ‘legumes’) were included as whole plants, whilst trees and shrubs were included if analyses were carried out on  
119 foliage. For our analyses, the foliage of trees and shrubs were grouped together (hereafter termed ‘tree’).

120 Sites were allocated to a bioclimatic zone as defined by the Köppen–Geiger climate classification system  
121 (Kottek et al. 2006) and recorded in the database as arid ( $\geq 70$  % of precipitation falls in summer or winter),  
122 equatorial (mean temperature of the coldest month  $\geq 18$  °C), temperate (mean temperature of the warmest month  
123  $\geq 10$  °C and the coldest month  $-3$ – $18$  °C) or tundra (mean temperature of the warmest month  $\geq 10$  °C and the  
124 coldest month  $\leq -3$  °C). Hot and dry zones (arid and equatorial) and cool and wet zones (temperate and tundra)  
125 were grouped together (for details of the sites included in the database see Supplementary Material 1).

126

### 127 **Representation in the database**

128 The database contained 1,255 geo-located records with 3,774 measurements of nutritive values for 136 forage  
129 plant species or hybrid cultivars grown in 30 countries (for a summary of all of the mean nutritive values across  
130 all plant species see Supplementary Material 2). The most commonly recorded nutritive metric was CP, which  
131 was measured in 88% of the records and in all 30 countries. This was followed by the two fibre metrics, ADF  
132 and NDF, which were measured in 65% and 64% of the records (22 and 25 of the countries), respectively. ADL,  
133 Ash and DM were less commonly recorded, and were present in 20%, 16% and 20% of the records (13, 15 and  
134 14 countries), respectively. Of the two digestibility metrics, DMD was recorded more than twice as frequently  
135 as OMD, and they were both recorded from 14 and 9 countries, respectively.

136 Grasses were the most commonly recorded functional group, representing 87% of all records, with legumes,  
137 trees and herbs making up 10%, 3% and 1% of the dataset, respectively. Records were the most numerous from  
138 the tundra bioclimatic zone, comprising 49% of the dataset, compared with 33% from the temperate zone, 15%  
139 from the arid zone and 3% from the equatorial zone. However, temperate records were more likely to contain  
140 multiple nutritive metrics and therefore the temperate zone contributed the largest total number of measurements

141 to the dataset (2035 values), followed by tundra (981 values), arid (541 values) and equatorial zones (217  
142 values).

143

#### 144 **Statistics**

145 Nutritive metrics, Ash, ADF, ADL, DM, NDF and CP were correlated with both DMD and OMD using linear  
146 regression analyses, with degrees of fit for regression lines calculated using  $r^2$ . In all cases either DMD or OMD  
147 was the response variable with the other metrics included as potential explanatory variables. Prior to statistical  
148 testing, data were tested for non-linearity by comparing quadratic and logarithmic models with linear models. In  
149 all cases linear models were the most appropriate. Variation between functional groups and bioclimatic zones  
150 for each nutritive metric was assessed using Analysis of Variance (ANOVA) tests, with significant differences  
151 between individual zones and groups identified using Tukey's Honest Significant Different (HSD) tests. All  
152 analyses were computed using R version 3.2.3 (The R Foundation for Statistical Computing, Vienna, Austria,  
153 2016).

154 **Results**

155 **Comparisons of nutritive metrics**

156 The mean DM across all of the forage plants was 41% and the mean water content of the plants was 59% (Table  
157 1). In terms of the fibre content across the whole dataset, means values for ADF and NDF were 32% and 57%,  
158 respectively. Mean CP was the next highest value at 15%, with mean ash at 9% and mean ADL at 6%. Overall,  
159 of the plant material that was measured, a mean of 71% in terms of DMD, and a mean of 62% in terms of OMD,  
160 was digestible.

161 → Table 1

162 There was a larger range of values for OMD than for DMD, with digestibility ranging from 2-91% and from 31-  
163 97%, for the two metrics, respectively. In terms of the other nutritive metrics, DM had the largest range of  
164 values, ranging from 11-97%, followed by NDF at 23-90%, ADF at 13-60% and CP at 2-36%. The metrics with  
165 the largest ranges also represented the largest number of different plant species, since CP was recorded from 132  
166 species, NDF was recorded from 116 species and ADF was recorded from 100 species. The exception to this  
167 was DM which was recorded from 67 forage plant species.

168 → Table 2

169 Several of the nutritive metrics were correlated with DMD and OMD, but there were differences in the degree of  
170 fit around the regression lines and the direction of the relationships (Table 2). NDF was strongly negatively  
171 correlated with both DMD and OMD, as indicated by high  $r^2$  values. CP was the only metric which was  
172 positively correlated with digestibility, both in terms of DMD and OMD, though the degree of fit of the  
173 regression line for CP and OMD was relatively low. ADF was also negatively correlated with DMD and OMD  
174 but the amount of variation explained by the regression line, and thus the degree of fit, was much lower than for  
175 NDF. ADL and DM were also negatively correlated with OMD but the degree of fit was lower between DMD  
176 and these two metrics.

177 **Geographical variation between functional groups**

178 Fibre values of the forage plants grown in arid and equatorial regions were a mean of 18% and 11% higher than  
179 those grown in temperate and tundra region, as defined by NDF (Figure 1a) and ADF (Figure 1b), respectively.  
180 However, CP values of forage plants grown across these drier regions were a mean of 2% lower than for plants  
181 grown in temperate or tundra regions (Figure 1c). Forage plants in arid and equatorial regions also contained  
182 greater amounts of ADL; a mean 3% greater than temperate and tundra regions (Figure 1d). DM contents were

183 generally higher (and thus water contents lower) and mineral ash content lower in arid and equatorial regions  
184 (Table 3). Both of the digestibility metrics were lower for plants grown in arid and equatorial regions; a mean of  
185 77% and 78% of the plant material grown in temperate and tundra regions was digestible when compared with  
186 30% and 54% of the plants grown in arid and equatorial regions, considering both DMD and OMD,  
187 respectively.

188 → Figure 1

189 Grasses and tree foliage generally contained the most fibre; mean NDF was highest across the grasses at 59%  
190 and tree foliage at 50%, whilst NDF for legumes was the lowest with a mean of 42% (Figure 1a). Mean ADF  
191 displayed a similar pattern to NDF, with tree foliage having a mean ADF of 34% and the grasses having a mean  
192 of 33% (Figure 1b). As with NDF, legumes were the lowest in terms of ADF with a mean of 28%. Herbs were  
193 not significantly different from grasses, legumes or tree foliage in terms of either ADF or NDF.

194 Mean CP values for herbs, grasses and tree foliage were 14%, 15% and 15%, respectively – and were not  
195 significantly different from each other (Figure 1c). However, the mean CP value of legumes was greater than the  
196 other groups at 21%. The mean ADL value for tree foliage was between 5% and 6% greater than the other three  
197 functional groups (Figure 1d). Mean ash values of legumes were 2-3% greater than the grasses and tree foliage  
198 but not different from the herbs. There were no detectable differences in the digestibility of the functional  
199 groups, either in terms of DMD or OMD (Table 3).

200 → Table 3

201

## 202 **Capacity for variation within- and between-species**

### 203 **Dry matter content**

204 The DM content of the forage plants was highly variable. At the upper end of the range of values the grasses,  
205 *Cynodon nlemfuensis* and *Chloris pycnothrix* were both measured at 97% whilst *Cenchrus ciliaris* was  
206 measured at 96%. The foliage of three tree species were also very high in terms of DM, with *Grewia mollis*,  
207 *Capparis tomentosa* and *Leucaena leucocephala* all recorded at 93%. At the lower end of the scale, the lowest  
208 values were recorded from *Lolium perenne*, *Trifolium pratense* and *Medicago sativa* at 11%, 11% and 13%,  
209 respectively. The largest ranges of DM values that were recorded were from the grass, *Panicum maximum* (22-  
210 91%), the tree, *Leucaena leucocephala* (24-93%), the herbaceous legume, *Lablab purpureus* (43-91%) and the  
211 grass, *Lolium perenne* (11-37%).



212 → Figure 2

213

## 214 **Fibre**

215 There was also substantial variation in NDF values both within- and between-species (Figure 2). The largest  
216 absolute NDF values were recorded from the grasses; *Bouteloua gracilis* at 90%, *Aristida longiseta* at 88% and  
217 *Setaria macrostachya* at 86%. The maximum value recorded from any other functional group related to the  
218 foliage of two trees; *Bauhinia cheilantha* at 68% and *Mimosa caesapiniifolia* at 68%. NDF for tree foliage,  
219 herbs and legumes were clustered at the lower end of the range of values. The minimum values of NDF were  
220 recorded from the herbaceous legume, *Psophocarpus scandens* at 23%, the grass, *Dactylis glomerata* at 27%  
221 and the herb, *Sanguisorba minor* at 30%. The largest ranges of NDF values that were recorded were from the  
222 grasses; *Dactylis glomerata* (27-71%), *Phleum pratense* (36-68%), *Alopecurus pratensis* (39-70%) and *Lolium*  
223 *perenne* (34-62%).

224 The largest ADF values were also measured from the grasses; *Hyparrhenia hirta* at 60% and *Enteropogon*  
225 *macrostachus* at 57%, whilst the foliage of the tree, *Mimosa caesapiniifolia*, was also recorded at 55%. High  
226 ADF values were rarer than high NDF and only 3% of ADF values in the database were greater than 50%. The  
227 lowest ADF values were measured from the grasses, *Phleum pratense*, *Agropyron riparium*, *Dactylis glomerata*,  
228 *Festuca arundinacea* and *Lolium multiflorum*, with values of 13%, 16%, 16%, 16% and 16%, respectively. The  
229 largest ranges of values were also measured from grasses; *Lolium perenne* (4-42%), *Lolium multiflorum* (2-  
230 35%), *Bromus inermis* (18-46%), *Dactylis glomerata* (16-44%) and *Phleum pratense* (13-38%).

231

## 232 **Protein**

233 There was less variation in CP values compared with ADF and NDF values, both within- and between-species  
234 (Figure 3). The largest CP values were recorded from the grasses, *Agropyron cristatum* at 36% and *Lolium*  
235 *perenne* at 34%, the legume, *Medicago sativa* at 32%, the grass, *Elytrigia intermedia* at 32% and the  
236 herbaceous legume, *Trifolium repens* at 32%. The lowest CP values were recorded from the grasses, *Aristida*  
237 *adscensionis*, *Hyparrhenia hirta* and *Chloris pycnothrix*; all at 2%. CP values for tree foliage, herbs and  
238 legumes were less clustered than for NDF but were more abundant towards the upper end of the range of values.  
239 The largest ranges of CP values were recorded from the grasses; *Agropyron cristatum* (8-36%), *Lolium perenne*  
240 (6-34%), *Lolium multiflorum* (6-28%) and *Elymus sibiricus* (5-26%).

241 → Figure 3

242

### 243 **Mineral ash**

244 The largest ash values were recorded across different functional groups, with maximum values recorded from  
245 the foliage of the tree, *Diospyros abyssinica* at 22%, the grass, *Pennisetum purpureum* at 19%, and the  
246 herbaceous legume, *Macroptilium atropurpureum* at 17%. High values were rare and only 4% of ash values  
247 were greater than 15%. Conversely, 70% of ash values were less than 10%, with minimum values of 2%, 2%,  
248 2% and 4% recorded from the grasses, *Pennisetum purpureum*, *Pennisetum maximum* and *Brachiaria brizantha*,  
249 and from the foliage of *Bauhinia cheilantha*, respectively. The maximum ranges of ash values were recorded  
250 from the grasses, *Pennisetum purpureum* (2-18%), *Panicum maximum* (7-16%) and *Avena strigosa* (5-13%), as  
251 well as the foliage of two trees; *Terminalia brownie* (8-14%) and *Diospyros abyssinica* (16-22%).

252

### 253 **Lignin**

254 The largest ADL values (i.e. those above 10%) were uncommon and represented only 12% of the dataset. Tree  
255 foliage of *Albizia amara* registered the greatest ADL content at 21%, with the grass *Brachiaria brizantha* and  
256 hybrid grass *Brachiaria ruziziensis x decumbens* having maximum ADL values of 21% and 19%, respectively.  
257 Foliage from *Grewia mollis* also had high ADL, with a maximum value of 19%. Low ash values were more  
258 common than high values across the dataset, with minimum values of 1% all recorded from the grasses; *Lolium*  
259 *multiflorum*, *Lolium perenne*, *Phleum pratense* and *Festuca arundinacea*, respectively. The ranges of values was  
260 also low for ADL, with the maximum ranges measured from the foliage of the tree *Albizia amara* (11-21%), the  
261 grass, *Setaria incrassate* (3-10%), the tree, *Grewia mollis* (12-19%) and the grass, *Chloris ciliata* (2-8%).

262

### 263 **Digestibility**

264 The greatest absolute DMD values were recorded from the grass, *Phleum pratense* at 97%, with another grass,  
265 *Dactylis glomerata* at 90%, as well as the legumes, *Trifolium repens* at 89% and *Trifolium ambiguum* at 88%,  
266 also producing very high values. The largest DMD value for tree foliage was 79% for *Manihot pseudoglaziovii*  
267 and for the herbs it was 74% for *Carum carvi*. DMD values were recorded as low as 31% for *Hyparrhenia hirta*,  
268 34% for *Aristida adscensionis*, 34% for *Enteropogon macrostachys* and 35% for *Enteropogon macrostachys* –

269 all of which are grasses. The greatest ranges of DMD values were recorded for the grasses; *Elymus sibiricus*  
270 (47-85%), *Phleum pratense* (61-97%), *Hyparrhenia hirta* (31-64%) and *Lolium perenne* (56-86%).

271 There was a greater range of OMD values than DMD values, with the maximum OMD value recorded from  
272 *Lolium perenne* at 91%, with high values also recorded from the foliage of *Leucaena leucocephala* at 88%, the  
273 grasses, *Dactylis glomerata* and *Arrhenatherum elatius* each at 78%, with the hybrid grass *Festuca arundinacea*  
274 x *Lolium multiflorum* also reporting a high value of 77%. Low values of 3%, 4% and 9% were recorded from  
275 *Agropyron cristatum*, *Bromus inermis* and *Poa attenuata*, respectively. The largest ranges of OMD values were  
276 also recorded for the grasses; *Elymus sibiricus* (12-60%), *Lolium perenne* (61-91%), *Bromus inermis* (4-27%)  
277 and *Poa attenuata* (9-25%).

278 **Discussion**

279 Forage plant nutrition is an important determinant of wild and domesticated herbivore population dynamics,  
280 plant/herbivore interactions and animal behaviour (Humphreys et al, 2005). Larger patch areas and enhanced  
281 plant biomass production have been correlated with larger and more persistent herbivore populations (e.g.  
282 Hanski & Thomas, 1994; Schlinkert *et al.*, 2016). However, if the currency of foraging theory is the provision of  
283 nutrition, then this dataset clearly demonstrates that individual plants or patches of plants with the same standing  
284 or dry biomass may be vastly different in terms of their nutritive values. This dataset shows that as much as 89%  
285 or as little as 3% of the standing biomass of forage plants is made up of water which dictates the amount of  
286 water which must be obtained from other water sources by consumers. These data also demonstrate that 91% of  
287 a forage plant may be digestible, compared with 2% for the least digestible plants (defined by OMD). Fibre  
288 (defined by NDF) can range by 23-90%, protein by 2-36%, lignin by 8-21% and minerals (defined by ash) by 2-  
289 22%. Such large variation in the nutritive values of forage plants changes the energetic costs of consumption  
290 versus the benefits of nutrient extraction for consumers.

291 Warmer regions have been associated with taller, less nutritious and slow-growing grasses (Jégo et al. 2013).  
292 Across all of the functional groups, this analysis showed that forage plants grown in warmer and drier regions  
293 were generally of lower nutritive value, as indicated by higher fibre, higher lignin and lower protein contents.  
294 These plants were also generally less readily digestible than those grown in cooler and wetter regions, as had  
295 been hypothesised. The reduced nutritive value of forage plants grown across these regions may be driven by  
296 increased abundances of plants with adaptations to avoid water loss and prevent heat stress. Adaptations include  
297 greater stem:leaf ratios, greater hair densities, thicker cell walls, more narrowly spaced veins, a higher  
298 proportion of epidermis, bundle sheaths, sclerenchyma and vascular tissues, and greater concentrations of lignin  
299 and silica (Kering et al. 2011).

300 Many species of arthropods, birds and mammals actively select or avoid plants based on their nutritive values  
301 (Greenberg and Bichier 2005; Amato and Garber 2014). This dataset demonstrates that these decisions are  
302 crucial. Lower nutritive value diets can lead to higher mortality rates, lower pregnancy rates, production of  
303 fewer offspring and a higher risk of predation (Proffitt et al. 2016). An analysis of 77 mammalian herbivores  
304 showed that larger animals better tolerate diets of lower nutritive quality because they can consume a greater  
305 volume of vegetation without increasing the efficiency of digestion (Müller et al. 2013). Larger herbivores also  
306 process their food more slowly, and are generally ruminants, whereas smaller hindgut fermenters feed  
307 selectively on the most digestible plants (Illius and Gordon 1992; Clauss et al. 2003). These data suggest that,  
308 across arid and equatorial regions, larger ruminant herbivores may be favoured by the lower nutritive values of

309 the forage plants which grow there, whereas smaller hindgut fermenters may be favoured in temperate and  
310 tundra regions. There are other factors which also play important roles, including predation or poaching risk,  
311 competition, temperature stress and drought frequency (Gaston and Blackburn 1995; Cardillo and Bromham  
312 2001).

313 Regional and inter-annual variability in climate generates corresponding variation in forage nutritive values  
314 (Grant et al. 2014; Ray et al. 2015). This variability influences animal migrations, for example wildebeest and  
315 zebra travel larger distances and remain within grazing patches for shorter period when forage is of high  
316 nutritive value (Hopcraft et al. 2014). Herbivores that do not migrate display the opposite pattern, since they  
317 spend more time in the same patch consuming the more nutritious forage plants (Laca et al. 1994). The spatial  
318 and temporal variation in forage plants shown here may contribute to explanations of optimal herbivore  
319 migration strategies and foraging behaviour. In addition, reduction in forage quality driven by climate change  
320 have been projected (Lee et al. 2017). Lower nutritive values in warmer bioclimatic zones adds further evidence  
321 to these projections and also suggests that future changes to forage nutritive values may modify migration and  
322 grazing strategies (Walther et al. 2002). Enteric methane production is also increased when ruminants consume  
323 lower quality forage, and methane emissions may also be influenced by these spatial and temporal patterns in  
324 forage nutritive values (Knapp et al. 2014).

325 Grazing lands have expanded to supply the growing demand for meat and dairy products, particularly across  
326 Asia and South America, and now cover 35 million km<sup>2</sup> of the Earth's surface (FAOSTAT, 2016). The majority  
327 of the world's livestock are subject to permanent or seasonal nutritional stress (Bruinsma 2003). Poor animal  
328 nutrition impairs livestock productivity across many smallholder farms, particularly in Africa and the  
329 developing world (Thornton et al. 2011). It has been suggested that plantation crops and industrial by-products  
330 may enhance animal nutrition (Thornton and Herrero 2010; Herrero et al. 2013). However, this dataset  
331 demonstrates that assessments of the nutritive values of forage plants may identify species with useful nutritive  
332 traits. This analysis was not limited to the developing world, and this database summarising the nutritive values  
333 of forage plants, may be used to identify species which can be cultivated across different regions according to  
334 the nutritive values needed. In the USA, for example, the nutritive values of forage plants has declined over the  
335 past 22 years and this decline has been linked with drought, rising atmospheric CO<sub>2</sub> concentrations, and  
336 sustained nutrient export (Craine et al. 2017). Forage species of high nutritive value which grow in warmer and  
337 drier regions could be selected. Future responses to global changes must also be considered, with warming,  
338 modified rainfall patterns, fertilisation and CO<sub>2</sub> enrichment associated with changes to forage plant productivity  
339 and nutritive quality (Milchunas et al. 2005; Craine et al. 2010; Lee et al. 2010, 2014).

340

341 **Grasses**

342 Grasses grow rapidly and are frequently described as the most tolerant group to herbivory (Wang et al. 2012,  
343 2013). In the year 2000, 48 % (2.3 billion tons) of the biomass consumed by livestock was grass, followed by  
344 grains (1.3 billion tons). The remainder of livestock feed (0.1 billion tons) was derived from the leaves and  
345 stalks of field crops, such as corn, sorghum and soybean (Herrero et al. 2013). Grasses were the most variable  
346 group in this dataset. This was, in part, because grasses comprised the majority of the data points. However,  
347 these data revealed the extent by which grasses may vary in their nutritive values in terms of DM (11-97%),  
348 water (3-89%), protein (2-36%), fibre (defined by NDF; 29-90%), minerals (defined by ash; 2-19%) and lignin  
349 contents (1-21%).

350 It has been shown that birds, amphibians, reptiles, mammals and arthropods select grasses based on nutritive  
351 values (Simpson and Raubenheimer 1993; Simpson et al. 2004). In a study of wild grass-consuming herbivores  
352 across Africa, diet composition was shown to be consistent within consumer species but varied between  
353 consumer species, whilst total biomass intakes were constant indicating that grass nutritive characteristics were  
354 important determinants of herbivore body sizes (Kartzinel et al. 2015). Such variation may contribute to niche  
355 segregation and to the coexistence of large herbivores of relatively similar body mass, as observed in mountain  
356 ecosystems (Redjadj et al. 2014). This dataset provides further evidence for forage driven niche segregation  
357 among herbivores by quantifying the substantial capacity for variation in nutritive values between forage species  
358 and functional groups, as assessed by different nutritive metrics.

359

360 **Legumes**

361 Cultivating herbaceous legumes has been proposed as a method for improving the protein content of pasture,  
362 particularly in the arid and equatorial rangelands of Asia, Africa and Latin America (Derner et al. 2017).  
363 Herbaceous legumes are planted increasingly frequently across temperate and tundra regions, in part because of  
364 their elevated protein content, improving meat and milk protein, and in part because of enhanced soil nitrogen  
365 availability, reduced fertiliser usage and reduced nitrous oxide emissions (Lüscher et al. 2014). Biomass  
366 production can be increased by fertilisation and legumes can be tolerant to increased salinity, albeit at low  
367 concentrations (Zouhaier et al. 2016). Some wild herbivores are specialist legumes feeders and have different  
368 nutritive requirements from generalists or those which consume plants in other functional groups (Karowe  
369 2007). This dataset demonstrates that legumes generally provide greater concentrations of protein, supporting

370 their use as a component of livestock fodder. The magnitude of the increased protein content of legumes was  
371 greatest across arid and equatorial regions, where the benefits of additional protein in human diets may be  
372 greatest (Tilman and Clark 2014).

373 Legumes also generally contain lower levels of fibre and higher concentrations of minerals than grasses. This  
374 may be driven by the branched venation patterns of the leaves of herbaceous legumes compared with the parallel  
375 system of vascular bundles running the length of grass leaves combined with their shorter habit which requires  
376 less structural fibre (Jung and Allen 1995). Herbaceous legumes may therefore have the combined nutritive  
377 benefits across arid and equatorial regions of greater protein and lower fibre contents compared with grasses. It  
378 should be noted that some grasses contained high protein, high minerals, low fibre and low lignin contents and  
379 there was no difference in mean digestibility between grasses and legumes. Care must be taken to consider the  
380 full suite of nutritive metrics, including their positive or negative effects on overall plant productivity, when  
381 selecting herbaceous legumes for use as livestock fodder (Wagner et al. 2016).

382

### 383 **Tree foliage**

384 Trees and shrubs can deliver forage alongside several other ecosystem services, including carbon storage, soil  
385 fertility, flood defence and biodiversity enhancement, and there has been recent research interest in quantifying  
386 the benefits of silvopastoral livestock systems (Santos et al. 2016), particularly in restoring degraded pasture  
387 (Yamamoto et al. 2007). Trees can provide supplementary forage, because tree foliage has different nutritional  
388 profiles to other functional groups and trees are also productive during the times of the year when other plants  
389 are scarce (Salem et al. 2006). Tree leaves are also important foods for arboreal wild herbivores, such as  
390 primates, rodents, and marsupials, which often select foliage of high nutritive value and avoid leaves with high  
391 tannin or lignin contents (Farmer, 2014). Across this dataset, tree foliage was generally higher in terms of lignin  
392 and fibre contents than the other functional groups, and the ranges of values of DM (22-93%), water (7-78%),  
393 protein (10-25%), fibre (as defined by NDF; 33-68%), minerals (4-22%) and lignin contents (3-21%), were  
394 generally lower than the grasses and in line with those found for herbaceous legumes. High lignin and fibre  
395 contents of tree foliage could limit livestock productivity, however, it has been shown that cattle consuming tree  
396 foliage as a supplement to grass can continue to deliver high milk and meat yields (Andrade et al, 2008). Some  
397 tree species can regrow foliage following herbivory, however, increased light intensity can increase tannin  
398 concentrations (Nabeshima et al. 2003). As with legumes, care must be taken in selecting tree species for  
399 inclusion in cattle diets, in particular by quantifying lignin and tannin contents. Understanding the roles of

400 different nutritive components may also provide a deeper understanding of arboreal herbivore population  
401 dynamics and behaviour (Coley and Barone 1996).

402

### 403 **Herbaceous non-legumes**

404 Generally the productivity of non-leguminous herbaceous plants is much lower than the other functional groups,  
405 limiting their use for livestock fodder (Kallah et al. 2000; Elgersma et al. 2014). However, the advantages of  
406 cultivating herbaceous non-legumes include the prevention of weed establishment, the enhancement of  
407 conservation value, the extension of grazing periods and elevated forage mineral contents (Pirhofer-Walzl et al.  
408 2011). There were few nutritive differences between the herbaceous non-legumes and the other functional  
409 groups, although herbs generally contained less fibre than grasses, less protein than legumes and less lignin and  
410 fibre than trees. Planting some herbaceous species can enhance livestock productivity and can also modify the  
411 taste of dairy products (Vasta et al. 2008). Many wild herbivores also utilise herbaceous plants for food,  
412 particularly arthropods (Siemann et al. 1999). This dataset highlights that some herbaceous plants may offer  
413 nutritional costs and benefits to livestock and wild herbivores, and studying their nutritive values may provide  
414 insight into herbivore population dynamics. However, due to the low representation of this group in the dataset,  
415 further work is required to fully quantify variation in the nutritive value of herbaceous non-legumes (Gasson and  
416 Cutler 1990).



417 **Conclusions**

418 This dataset reveals the extent by which different species of forage plants can vary in their nutritive value to  
419 herbivores. Some forage plant species were highly nutritious containing high concentrations of protein and  
420 minerals and low concentrations of fibre and lignin, resulting in high digestibility values. This highlights the  
421 importance of foraging decisions made by wild and domesticated herbivores. This dataset also demonstrates the  
422 capacity for improved livestock forage if species selection is based on forage quality. This may also be  
423 important for conservation efforts, if the nutritional requirements of the target organisms are well understood.  
424 Multiple agronomic nutritive metrics were considered in this analysis, and many were auto-correlated, but fibre  
425 content was the best predictor of low quality forage, as defined by low digestibility values. High fibre content or  
426 low digestibility may be the best proxy for poor quality forage. Forage quality was also lower in warmer and  
427 drier arid and equatorial regions suggesting that the availability of high quality forage across these regions is  
428 low. This information may contribute to explanations of variation in optimal herbivore body sizes, migration  
429 behaviour and grazing patterns. Projections of the effects of climate change on plant/herbivore interactions  
430 should consider future changes to forage plant nutritive values and plant species composition.

431

432 **Acknowledgements**

433 Thanks to Aaron Davis for advice on preparation of this manuscript.

434 **References**

- 435 Amato KR, Garber PA (2014) Nutrition and foraging strategies of the black howler monkey (*Alouatta pigra*) in  
436 palenque national park, Mexico. *Am J Primatol* 76:774–787. doi: 10.1002/ajp.22268
- 437 AOAC (2000) Official Methods of Analysis of AOAC International. *Assoc Off Anal Chem Int Method* 2–66.  
438 doi: 10.3109/15563657608988149
- 439 Bailey DW, Gross JE, Laca EA, et al (1996) Mechanisms That Result in Large Herbivore Grazing Distribution  
440 Patterns. *J Range Manag* 49:386–400. doi: 10.2307/4002919
- 441 Beecher M, Hennessy D, Boland TM, et al (2015) The variation in morphology of perennial ryegrass cultivars  
442 throughout the grazing season and effects on organic matter digestibility. *Grass Forage Sci* 70:19–29. doi:  
443 10.1111/gfs.12081
- 444 Cardillo M, Bromham L (2001) Body Size and Risk of Extinction in Australian Mammals. *Conserv Biol*  
445 15:1435–1440. doi: 10.1046/j.1523-1739.2001.00286.x
- 446 Chapman DF, Lee JM, Waghorn GC (2014) Interaction between plant physiology and pasture feeding value: A  
447 review. *Crop Pasture Sci*. 65:721–734.
- 448 Cherney DJR, Cherney JH (1997) Grass forage quality and digestion kinetics as influenced by nitrogen  
449 fertilization and maturity. *J Appl Anim Res* 11:105–120. doi: 10.1080/09712119.1997.9706170
- 450 Clauss M, Frey R, Kiefer B, et al (2003) The maximum attainable body size of herbivorous mammals:  
451 Morphophysiological constraints on foregut, and adaptations of hindgut fermenters. *Oecologia* 136:14–27.  
452 doi: 10.1007/s00442-003-1254-z
- 453 Coley PD, Barone JA (1996) Herbivory and Plant Defenses in Tropical Forests. *Annu Rev Ecol Syst* 27:305–  
454 335. doi: 10.1146/annurev.ecolsys.27.1.305
- 455 Craine JM, Elmore A, Angerer JP (2017) Long-term declines in dietary nutritional quality for North American  
456 cattle. *Environ Res Lett* 12:044019. doi: 10.1088/1748-9326/aa67a4
- 457 Craine JM, Elmore AJ, Olson KC, Tolleson D (2010) Climate change and cattle nutritional stress. *Glob Chang*  
458 *Biol* 16:2901–2911. doi: 10.1111/j.1365-2486.2009.02060.x
- 459 Delaby L, Peyraud JL (2009) Making the best use of the farm's forages for the production of milk. *Fourrages*  
460 198:38191–210.
- 461 Derner JD, Hunt L, Filho KE, et al (2017) Livestock Production Systems. In: Briske DD (ed) *Rangeland*

- 462 Systems: Processes, Management and Challenges. Springer International Publishing, Cham, pp 347–372
- 463 Distel RA, Didoné NG, Moretto AS (2005) Variations in chemical composition associated with tissue aging in  
464 palatable and unpalatable grasses native to central Argentina. *J Arid Environ* 62:351–357. doi:  
465 10.1016/j.jaridenv.2004.12.001
- 466 Dong SK, Long RJ, Hu ZZ, et al (2003) Productivity and nutritive value of some cultivated perennial grasses  
467 and mixtures in the alpine region of the Tibetan Plateau. *Grass Forage Sci* 58:302–308. doi:  
468 10.1046/j.1365-2494.2003.00382.x
- 469 Elgersma A, Sørengaard K, Jensen SK (2014) Herbage dry-matter production and forage quality of three legumes  
470 and four non-leguminous forbs grown in single-species stands. *Grass Forage Sci* 69:705–716. doi:  
471 10.1111/gfs.12104
- 472 FAOSTAT (2016) FAOSTAT Emissions database. Available at <http://faostat3.fao.org> (accessed 1/3/2016).
- 473 Farmer EE (2014) Leaf defence. Oxford: Oxford University Press.
- 474 French KE (2017) Species composition determines forage quality and medicinal value of high diversity  
475 grasslands in lowland England. *Agric Ecosyst Environ* 241:193–204. doi: 10.1016/j.agee.2017.03.012
- 476 Gardarin A, Garnier E, Carrere P, et al (2014) Plant trait-digestibility relationships across management and  
477 climate gradients in permanent grasslands. *J Appl Ecol* 51:1207–1217. doi: 10.1111/1365-2664.12293
- 478 Gasson PE, Cutler DF (1990) Tree root plate morphology. *Arboric J* 14:193–264. doi:  
479 10.1080/03071375.1990.9746845
- 480 Gaston KJ, Blackburn TM (1995) Birds, body size and the threat of extinction. *Philos Trans R Soc London B*  
481 347:205–212. doi: 10.1098/rstb.1995.0022
- 482 Grant K, Kreyling J, Dienstbach LFH, et al (2014) Water stress due to increased intra-annual precipitation  
483 variability reduced forage yield but raised forage quality of a temperate grassland. *Agric Ecosyst Environ*  
484 186:11–22. doi: 10.1016/j.agee.2014.01.013
- 485 Greenberg R, Bichier P (2005) Determinants of tree species preference of birds in oak–acacia woodlands of  
486 Central America. *J Trop Ecol* 21:57–66. doi: 10.1017/S0266467404001762
- 487 Hanski I, Thomas C (1994) Metapopulation dynamics and conservation: A spatially explicit model applied to  
488 butterflies. *Biol Conserv*. doi: 10.1016/0006-3207(94)90348-4
- 489 Herrero M, Havlík P, Valin H, et al (2013) Biomass use, production, feed efficiencies, and greenhouse gas

- 490 emissions from global livestock systems. *Proc Natl Acad Sci U S A* 110:20888–93. doi:  
491 10.1073/pnas.1308149110
- 492 Herrero M, Wirsenius S, Henderson B, et al (2015) Livestock and the Environment: What Have We Learned in  
493 the Last Decade? *Annu Rev Environ Resour* 40:177–202. doi: 10.1146/annurev-environ-031113-093503
- 494 Hopcraft JGC, Morales JM, Beyer HL, et al (2014) Competition, predation, and migration: Individual choice  
495 patterns of Serengeti migrants captured by hierarchical models. *Ecol Monogr* 84:355–372. doi:  
496 10.1890/13-1446.1
- 497 Illius AW, Gordon IJ (1992) Modelling the nutritional ecology of ungulate herbivores: evolution of body size  
498 and competitive interactions. *Oecologia* 89:428–434. doi: 10.1007/BF00317422
- 499 Jégo G, Bélanger G, Tremblay GF, et al (2013) Calibration and performance evaluation of the STICS crop  
500 model for simulating timothy growth and nutritive value. *F Crop Res* 151:65–77. doi:  
501 10.1016/j.fcr.2013.07.003
- 502 Jung HG, Allen MS (1995) Characteristics of plant cell walls affecting intake and digestibility of forages by  
503 ruminants. *J. Anim. Sci.* 73:2774–2790.
- 504 Kallah MS, Bale JO, Abdullahi US, et al (2000) Nutrient composition of native forbs of semi-arid and dry sub-  
505 humid savannas of Nigeria. *Anim Feed Sci Technol* 84:137–145. doi: 10.1016/S0377-8401(99)00131-5
- 506 Karowe DN (2007) Are legume-feeding herbivores buffered against direct effects of elevated carbon dioxide on  
507 host plants? A test with the sulfur butterfly, *Colias philodice*. *Glob Chang Biol* 13:2045–2051. doi:  
508 10.1111/j.1365-2486.2007.01422.x
- 509 Kartzinel TR, Chen PA, Coverdale TC, et al (2015) DNA metabarcoding illuminates dietary niche partitioning  
510 by African large herbivores. *Proc Natl Acad Sci* 112:8019–8024. doi: 10.1073/pnas.1503283112
- 511 Kering MK, Guretzky J, Funderburg E, Mosali J (2011) Effect of Nitrogen Fertilizer Rate and Harvest Season  
512 on Forage Yield, Quality, and Macronutrient Concentrations in Midland Bermuda Grass. *Commun Soil  
513 Sci Plant Anal* 42:1958–1971. doi: 10.1080/00103624.2011.591470
- 514 King C, McEniry J, Richardson M, O’Kiely P (2012) Yield and chemical composition of five common  
515 grassland species in response to nitrogen fertiliser application and phenological growth stage. *Acta Agric  
516 Scand Sect B-Soil Plant Sci* 62:644–658. doi: 10.1080/09064710.2012.687055
- 517 Knapp JR, Laur GL, Vadas PA, et al (2014) Invited review: Enteric methane in dairy cattle production:

- 518 quantifying the opportunities and impact of reducing emissions. *J Dairy Sci* 97:3231–3261. doi:  
519 10.3168/jds.2013-7234
- 520 Komac B, Domènech M, Fanlo R (2014) Effects of grazing on plant species diversity and pasture quality in  
521 subalpine grasslands in the eastern Pyrenees (Andorra): Implications for conservation. *J Nat Conserv*  
522 22:247–255. doi: 10.1016/j.jnc.2014.01.005
- 523 Kottek M, Grieser J, Beck C, et al (2006) World map of the Köppen-Geiger climate classification updated.  
524 *Meteorol Zeitschrift* 15:259–263. doi: 10.1127/0941-2948/2006/0130
- 525 Laca EA, Distel RA, Griggs TC, Demment MW (1994) Effects of canopy structure on patch depression by  
526 grazers. *Ecology* 75:706–716.
- 527 Lee M, Manning P, Rist J, et al (2010) A global comparison of grassland biomass responses to CO<sub>2</sub> and  
528 nitrogen enrichment. *Philos Trans R Soc Lond B Biol Sci* 365:2047–2056. doi: 10.1098/rstb.2010.0028
- 529 Lee MA, Davis AP, Chagunda MGG, Manning P (2017) Forage quality declines with rising temperatures, with  
530 implications for livestock production and methane emissions. *Biogeosciences* 14:1403–1417. doi:  
531 10.5194/bg-14-1403-2017
- 532 Lee MA, Manning P, Walker CS, Power SA (2014) Plant and arthropod community sensitivity to rainfall  
533 manipulation but not nitrogen enrichment in a successional grassland ecosystem. *Oecologia* 176:1173–  
534 1185. doi: 10.1007/s00442-014-3077-5
- 535 Lüscher A, Mueller-Harvey I, Soussana JF, et al (2014) Potential of legume-based grassland-livestock systems  
536 in Europe: A review. *Grass Forage Sci.* 69:206–228.
- 537 Milchunas DG, Mosier AR, Morgan JA, et al (2005) Elevated CO<sub>2</sub> and defoliation effects on a shortgrass  
538 steppe: Forage quality versus quantity for ruminants. *Agric Ecosyst Environ* 111:166–184. doi:  
539 10.1016/j.agee.2005.06.014
- 540 Millennium Ecosystem Assessment (2005) *Ecosystems and Human Well-being: Synthesis* (Millennium  
541 Ecosystem Assessment).
- 542 Müller DWH, Codron D, Meloro C, et al (2013) Assessing the Jarman-Bell Principle: Scaling of intake,  
543 digestibility, retention time and gut fill with body mass in mammalian herbivores. *Comp Biochem Physiol*  
544 - A Mol Integr Physiol 164:129–140. doi: 10.1016/j.cbpa.2012.09.018
- 545 Nabeshima E, Murakami M, Hiura T (2003) Erratum: Effects of herbivory and light conditions on induced

- 546 defense in *Quercus crispula* (Journal of Plant Research (2001) 114 (403-409)). J. Plant Res. 116:345.
- 547 Pirhofer-Walzl K, Sørengaard K, Høgh-Jensen H, et al (2011) Forage herbs improve mineral composition of  
548 grassland herbage. Grass Forage Sci 66:415–423. doi: 10.1111/j.1365-2494.2011.00799.x
- 549 Pontes LDS, Soussana JF, Louault F, et al (2007) Leaf traits affect the above-ground productivity and quality of  
550 pasture grasses. Funct Ecol 21:844–853. doi: 10.1111/j.1365-2435.2007.01316.x
- 551 Proffitt KM, Hebblewhite M, Peters W, et al (2016) Linking landscape-scale differences in forage to ungulate  
552 nutritional ecology. Ecol Appl 26:2156–2174. doi: 10.1002/eap.1370
- 553 Pyke GH (1984) Optimal Foraging Theory: A Critical Review. Annu Rev Ecol Syst 15:523–575. doi:  
554 10.1146/annurev.es.15.110184.002515
- 555 Ray DK, Gerber JS, MacDonald GK, West PC (2015) Climate variation explains a third of global crop yield  
556 variability. Nat Commun 6:5989. doi: 10.1038/ncomms6989
- 557 Redjadj C, Darmon G, Maillard D, et al (2014) Intra- and interspecific differences in diet quality and  
558 composition in a large herbivore community. PLoS One. doi: 10.1371/journal.pone.0084756
- 559 Salem AZM, Salem MZM, El-Adawy MM, Robinson PH (2006) Nutritive evaluations of some browse tree  
560 foliages during the dry season: Secondary compounds, feed intake and in vivo digestibility in sheep and  
561 goats. Anim Feed Sci Technol 127:251–267. doi: 10.1016/j.anifeedsci.2005.09.005
- 562 Santos D de C, Guimarães Júnior R, Vilela L, et al (2016) Forage dry mass accumulation and structural  
563 characteristics of Piatã grass in silvopastoral systems in the Brazilian savannah. Agric Ecosyst Environ  
564 233:16–24. doi: 10.1016/j.agee.2016.08.026
- 565 Schlinkert H, Westphal C, Clough Y, et al (2016) Plant size affects mutualistic and antagonistic interactions and  
566 reproductive success across 21 Brassicaceae species. Ecosphere. doi: 10.1002/ecs2.1529
- 567 Siemann E, Haarstad J, Tilman D (1999) Dynamics of plant and arthropod diversity during old field succession.  
568 Ecography (Cop) 22:406–414. doi: 10.1111/j.1600-0587.1999.tb00577.x
- 569 Simpson SJ, Raubenheimer D (1993) A Multi-Level Analysis of Feeding Behaviour: The Geometry of  
570 Nutritional Decisions. Philos Trans R Soc B Biol Sci 342:381–402. doi: 10.1098/rstb.1993.0166
- 571 Simpson SJ, Sibly RM, Lee KP, et al (2004) Optimal foraging when regulating intake of multiple nutrients.  
572 Anim Behav 68:1299–1311. doi: 10.1016/j.anbehav.2004.03.003
- 573 Thornton PK, Herrero M (2010) Potential for reduced methane and carbon dioxide emissions from livestock and

- 574 pasture management in the tropics. *Proc Natl Acad Sci* 107:19667–19672. doi: 10.1073/pnas.0912890107
- 575 Thornton PK, Jones PG, Ericksen PJ, Challinor AJ (2011) Agriculture and food systems in sub-Saharan Africa  
576 in a 4°C+ world. *Philos Trans A Math Phys Eng Sci* 369:117–36. doi: 10.1098/rsta.2010.0246
- 577 Tilman D, Clark M (2014) Global diets link environmental sustainability and human health. *Nature* 515:518–  
578 522. doi: <http://www.nature.com/nature/journal/v515/n7528/full/nature13959.html>
- 579 Van Soest PJ, Robertson JB, Lewis BA (1991) Methods for Dietary Fiber, Neutral Detergent Fiber, and  
580 Nonstarch Polysaccharides in Relation to Animal Nutrition. *J Dairy Sci* 74:3583–3597. doi:  
581 10.3168/jds.S0022-0302(91)78551-2
- 582 Vasta V, Nudda A, Cannas A, et al (2008) Alternative feed resources and their effects on the quality of meat and  
583 milk from small ruminants. *Anim. Feed Sci. Technol.* 147:223–246.
- 584 Wagner TC, Hane S, Joubert DF, Fischer C (2016) Herbaceous legume encroachment reduces grass productivity  
585 and density in arid rangelands. *PLoS One*. doi: 10.1371/journal.pone.0166743
- 586 Walther GR, Post E, Convey P, et al (2002) Ecological responses to recent climate change. *Nature* 416:389–395.  
587 doi: 10.1038/416389a
- 588 Wang XL, Liu D, Li ZQ (2012) Effects of the coordination mechanism between roots and leaves induced by  
589 root-breaking and exogenous cytokinin spraying on the grazing tolerance of ryegrass. *J Plant Res*  
590 125:407–416. doi: 10.1007/s10265-011-0442-x
- 591 Wang XL, Wang J, Li ZQ (2013) Correlation of continuous ryegrass regrowth with cytokinin induced by root  
592 nitrate absorption. *J Plant Res* 126:685–697. doi: 10.1007/s10265-013-0574-2
- 593 Weller RF, Cooper A (2001) Seasonal changes in the crude protein concentration of mixed swards of white  
594 clover/perennial ryegrass grown without fertilizer N in an organic farming system in the United Kingdom.  
595 *Grass Forage Sci* 56:92–95. doi: 10.1046/j.1365-2494.2001.00248.x
- 596 Wood SA, Karp DS, Declerck F, et al (2015) Functional traits in agriculture: agrobiodiversity and ecosystem  
597 services. *Trends Ecol Evol* 30:531–539. doi: 10.1016/j.tree.2015.06.013
- 598 Yamamoto W, Dewi IA, Ibrahim M (2007) Effects of silvopastoral areas on milk production at dual-purpose  
599 cattle farms at the semi-humid old agricultural frontier in central Nicaragua. *Agric Syst* 94:368–375. doi:  
600 10.1016/j.agsy.2006.10.011
- 601 Zouhaier B, Mariem M, Mokded R, et al (2016) Physiological and biochemical responses of the forage legume

602 Trifolium alexandrinum to different saline conditions and nitrogen levels. J Plant Res 129:423–434. doi:

603 10.1007/s10265-016-0791-6

604



605 Table 1: A count of the number of forage plant species in the database and the mean, median, maximum (max),  
606 minimum (min) and range of values across all of the records. Metrics are acid detergent fibre (ADF), acid  
607 detergent lignin (ADL), mineral ash (Ash), crude protein (CP), dry matter (DM), neutral detergent fibre (NDF),  
608 dry matter digestibility (DMD) and organic matter digestibility (OMD).

|                  | ADF | ADL | Ash | CP  | DM | NDF | DMD | OMD |
|------------------|-----|-----|-----|-----|----|-----|-----|-----|
| Plant species    | 100 | 73  | 69  | 132 | 67 | 116 | 42  | 21  |
| Mean value (%)   | 32  | 6   | 9   | 15  | 41 | 57  | 71  | 62  |
| Median value (%) | 31  | 6   | 9   | 14  | 22 | 56  | 73  | 73  |
| Max value (%)    | 60  | 21  | 22  | 36  | 97 | 90  | 97  | 91  |
| Min value (%)    | 2   | 1   | 2   | 2   | 11 | 23  | 31  | 2   |
| Range (%)        | 58  | 20  | 21  | 34  | 86 | 67  | 66  | 89  |

609 Table 2: Regression outputs of the relationships between dry matter digestibility (DMD) or organic matter  
610 digestibility (OMD) and acid detergent fibre (ADF), acid detergent lignin (ADL), mineral ash (ash), crude  
611 protein (CP), dry matter (DM) and neutral detergent fibre (NDF).

| Metric | Equation          | t     | DF  | P       | r <sup>2</sup> |
|--------|-------------------|-------|-----|---------|----------------|
| ADF    | DMD = -0.12 + 109 | -17.3 | 105 | < 0.001 | 0.74           |
| ADL    | DMD = -0.15 + 70  | -4.9  | 73  | < 0.001 | 0.24           |
| Ash    | DMD = -0.03 + 73  | -0.7  | 57  | 0.49    | 0.01           |
| CP     | DMD = 0.18 + 40   | 15.9  | 153 | < 0.001 | 0.62           |
| DM     | DMD = -0.09 + 87  | -5.2  | 71  | < 0.001 | 0.26           |
| NDF    | DMD = -0.10 + 130 | -17.7 | 146 | < 0.001 | 0.68           |
| ADF    | OMD = -0.12 + 91  | -4.8  | 67  | < 0.001 | 0.26           |
| ADL    | OMD = -0.57 + 96  | -17.3 | 31  | < 0.001 | 0.90           |
| Ash    | OMD = -0.34 + 108 | -2.8  | 12  | < 0.05  | 0.35           |
| CP     | OMD = 0.12 + 43   | 2.6   | 81  | < 0.05  | 0.06           |
| DM     | OMD = -0.04 + 79  | -4.7  | 30  | < 0.001 | 0.41           |
| NDF    | OMD = -0.09 + 120 | -15.3 | 79  | < 0.001 | 0.75           |

612 Table 3: Pairwise comparisons of temperate and tundra (Te) and arid and equatorial (Eq) bioclimatic zones and  
 613 pairwise comparisons of the functional groups; grass, herb, legume (leg) and tree, for each of the eight nutritive  
 614 metrics. Positive values indicate that the first stated parameter in the pair is greater than the second, with  
 615 associated P value.

|            | ADF |        | ADL |        | Ash |        | CP |        | NDF |        | DMD |        | OMD |        |
|------------|-----|--------|-----|--------|-----|--------|----|--------|-----|--------|-----|--------|-----|--------|
|            | V   | P      | V   | P      | V   | P      | V  | P      | V   | P      | V   | P      | V   | P      |
| Te-Eq      | -11 | <0.001 | -3  | <0.001 | 2   | <0.001 | 3  | <0.001 | -19 | <0.001 | 12  | <0.001 | 49  | <0.001 |
| grass-herb | 4   | >0.05  | -1  | >0.05  | -2  | >0.05  | 0  | >0.05  | 22  | <0.001 | -8  | >0.05  | -   | -      |
| leg-herb   | 0   | >0.05  | 1   | >0.05  | 0   | >0.05  | 6  | <0.05  | 6   | >0.05  | 7   | >0.05  | -   | -      |
| tree-herb  | 3   | >0.05  | 5   | <0.01  | -2  | >0.05  | 1  | >0.05  | 13  | <0.01  | 8   | >0.05  | -   | -      |
| leg-grass  | -4  | <0.001 | 2   | >0.05  | 3   | <0.001 | 6  | <0.001 | -16 | <0.001 | 15  | >0.05  | -8  | >0.05  |
| tree-grass | 0   | >0.05  | 6   | <0.001 | 0   | >0.05  | 1  | >0.05  | -9  | <0.001 | 16  | >0.05  | -13 | >0.05  |
| tree-leg   | 4   | <0.05  | 5   | <0.001 | -2  | <0.001 | -5 | <0.001 | 7   | <0.01  | 1   | >0.05  | -6  | >0.05  |

616

617 Figure 1: Boxplots representing the nutritive values of forage plants grown in arid and equatorial regions or  
618 temperature and tundra regions. Nutritive values are separated into plant functional groups; herbaceous non-  
619 legumes (herb), grasses, herbaceous legumes and trees. Metrics are (a) neutral detergent fibre, (b) acid detergent  
620 fibre, (c) crude protein and (d) acid detergent lignin.

621 Figure 2: Ascending median neutral detergent fibre content for 116 forage plant species. Box shading represents  
622 functional group. Values are percent of dry plant material (% DM).

623 Figure 3: Ascending median crude protein content for 132 forage plant species. Box shading represents  
624 functional group. Values are percent of dry plant material (% DM).

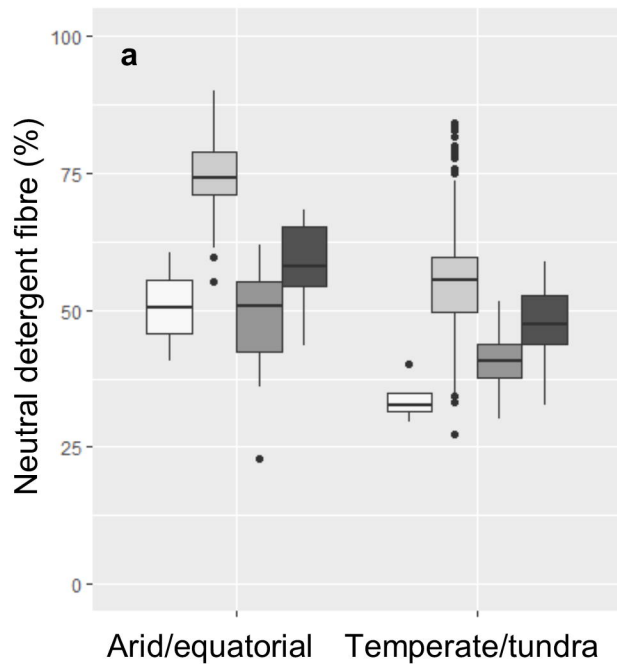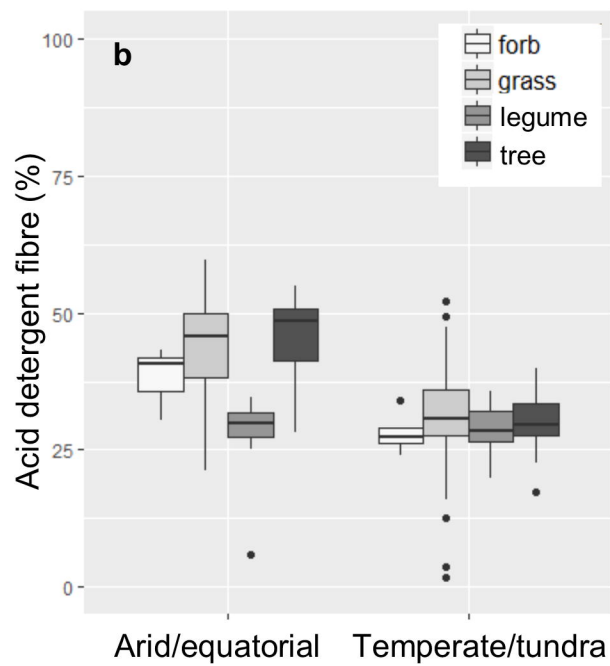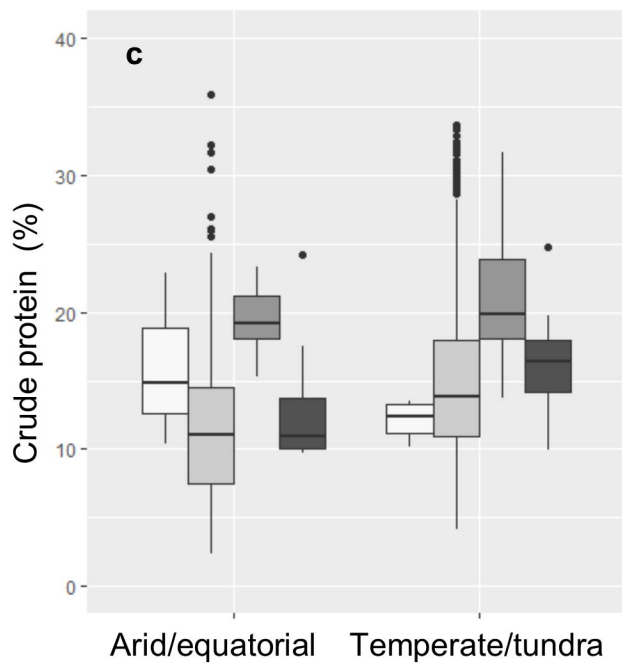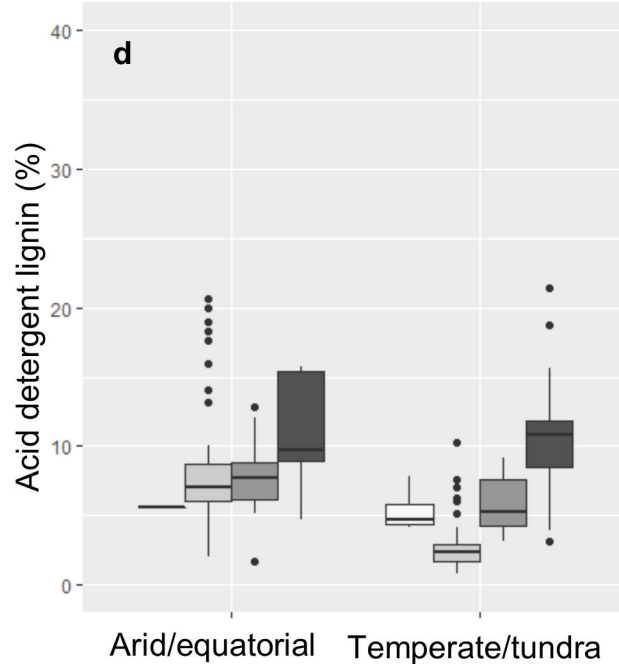

# Neutral detergent fibre (%)

20 40 60 80 100

bioRxiv preprint doi: <https://doi.org/10.1101/224808>; this version posted November 25, 2017. The copyright holder for this preprint (which was not certified by peer review) is the author/funder. All rights reserved. No reuse allowed without permission.

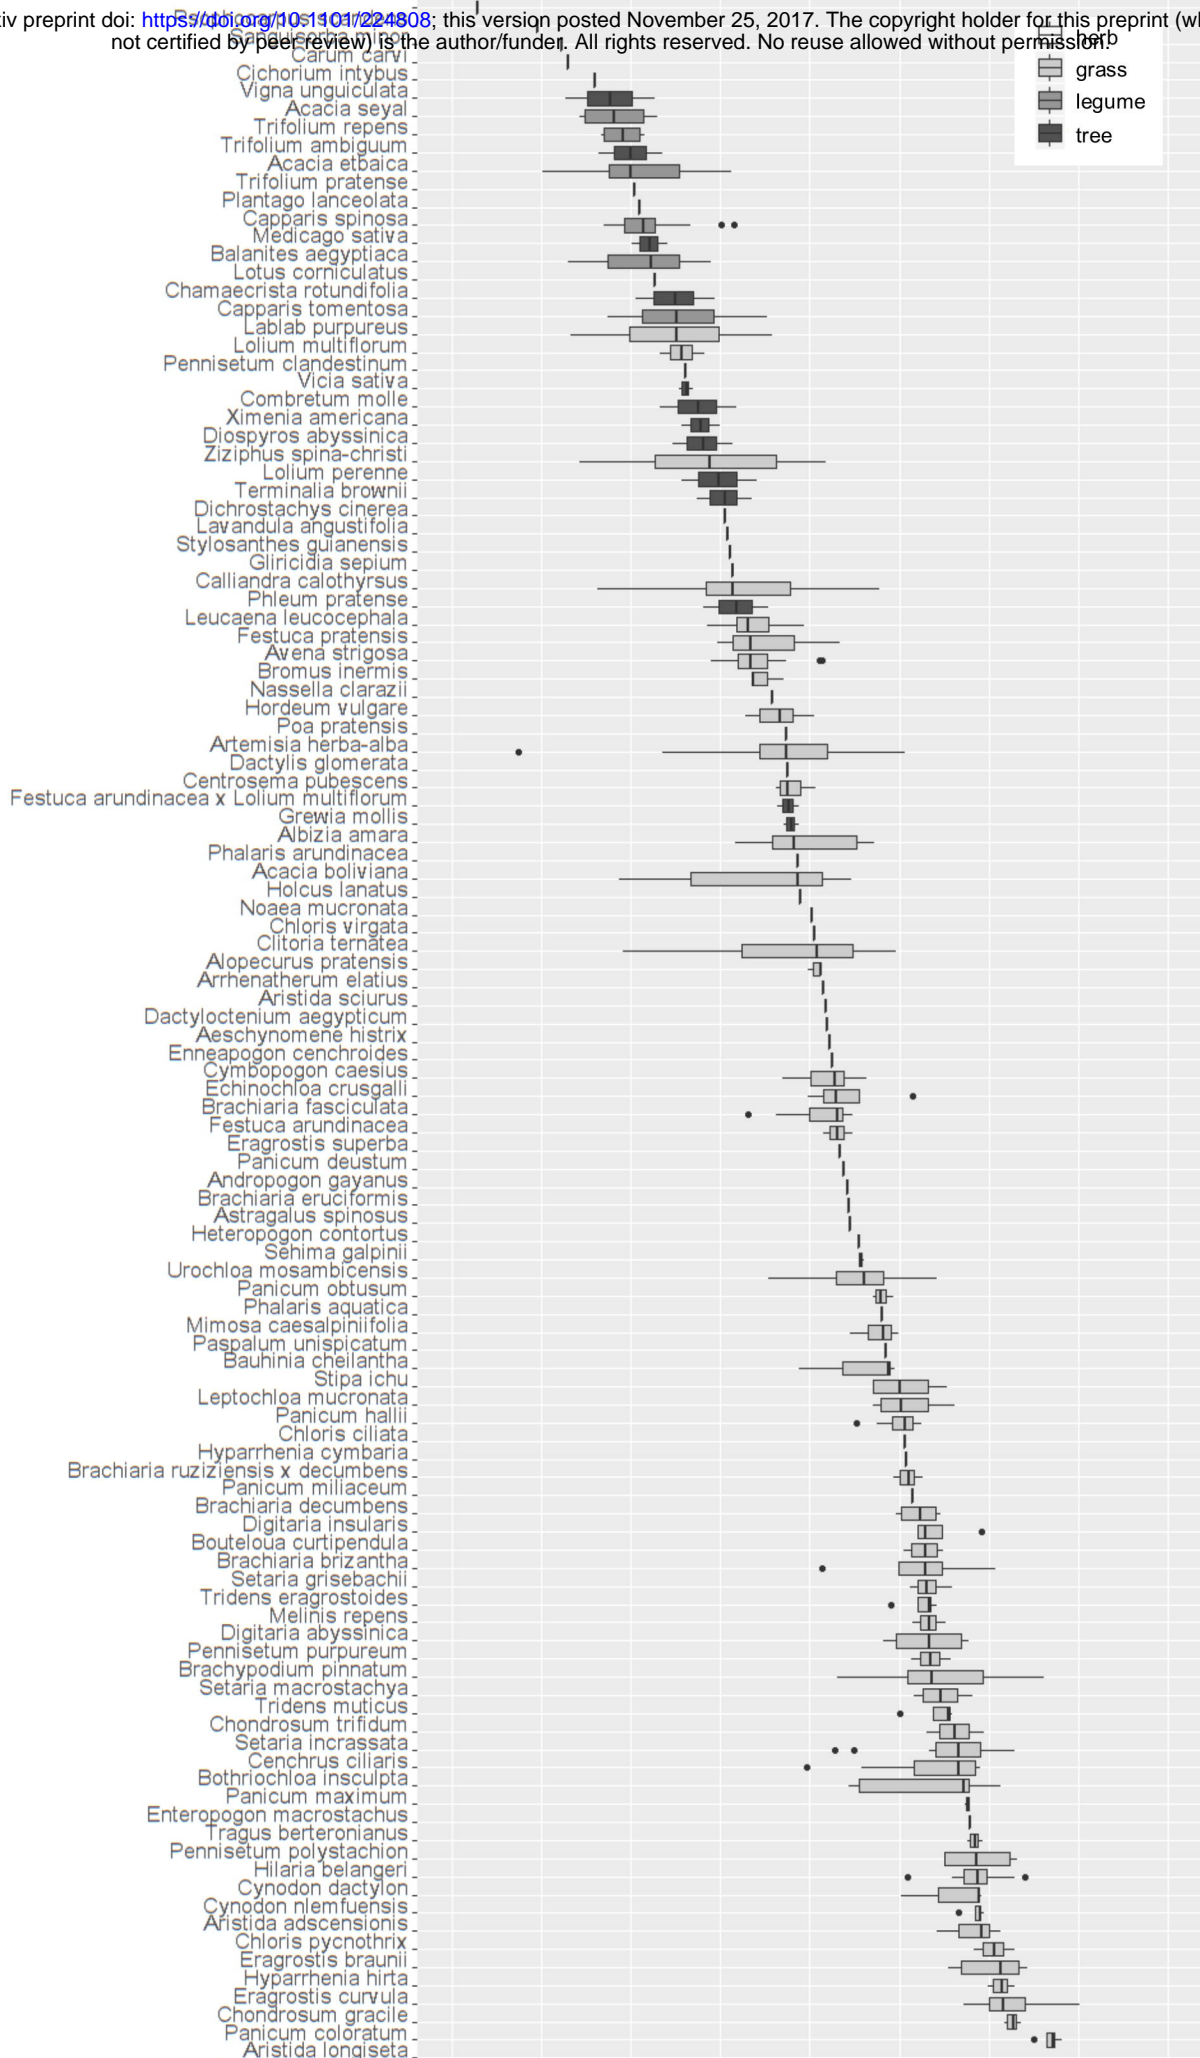

Crude protein (%)

0 10 20 30 40

bioRxiv preprint doi: <https://doi.org/10.1101/224808>; this version posted November 25, 2017. The copyright holder for this preprint (which was not certified by peer review) is the author/funder. All rights reserved. No reuse allowed without permission.

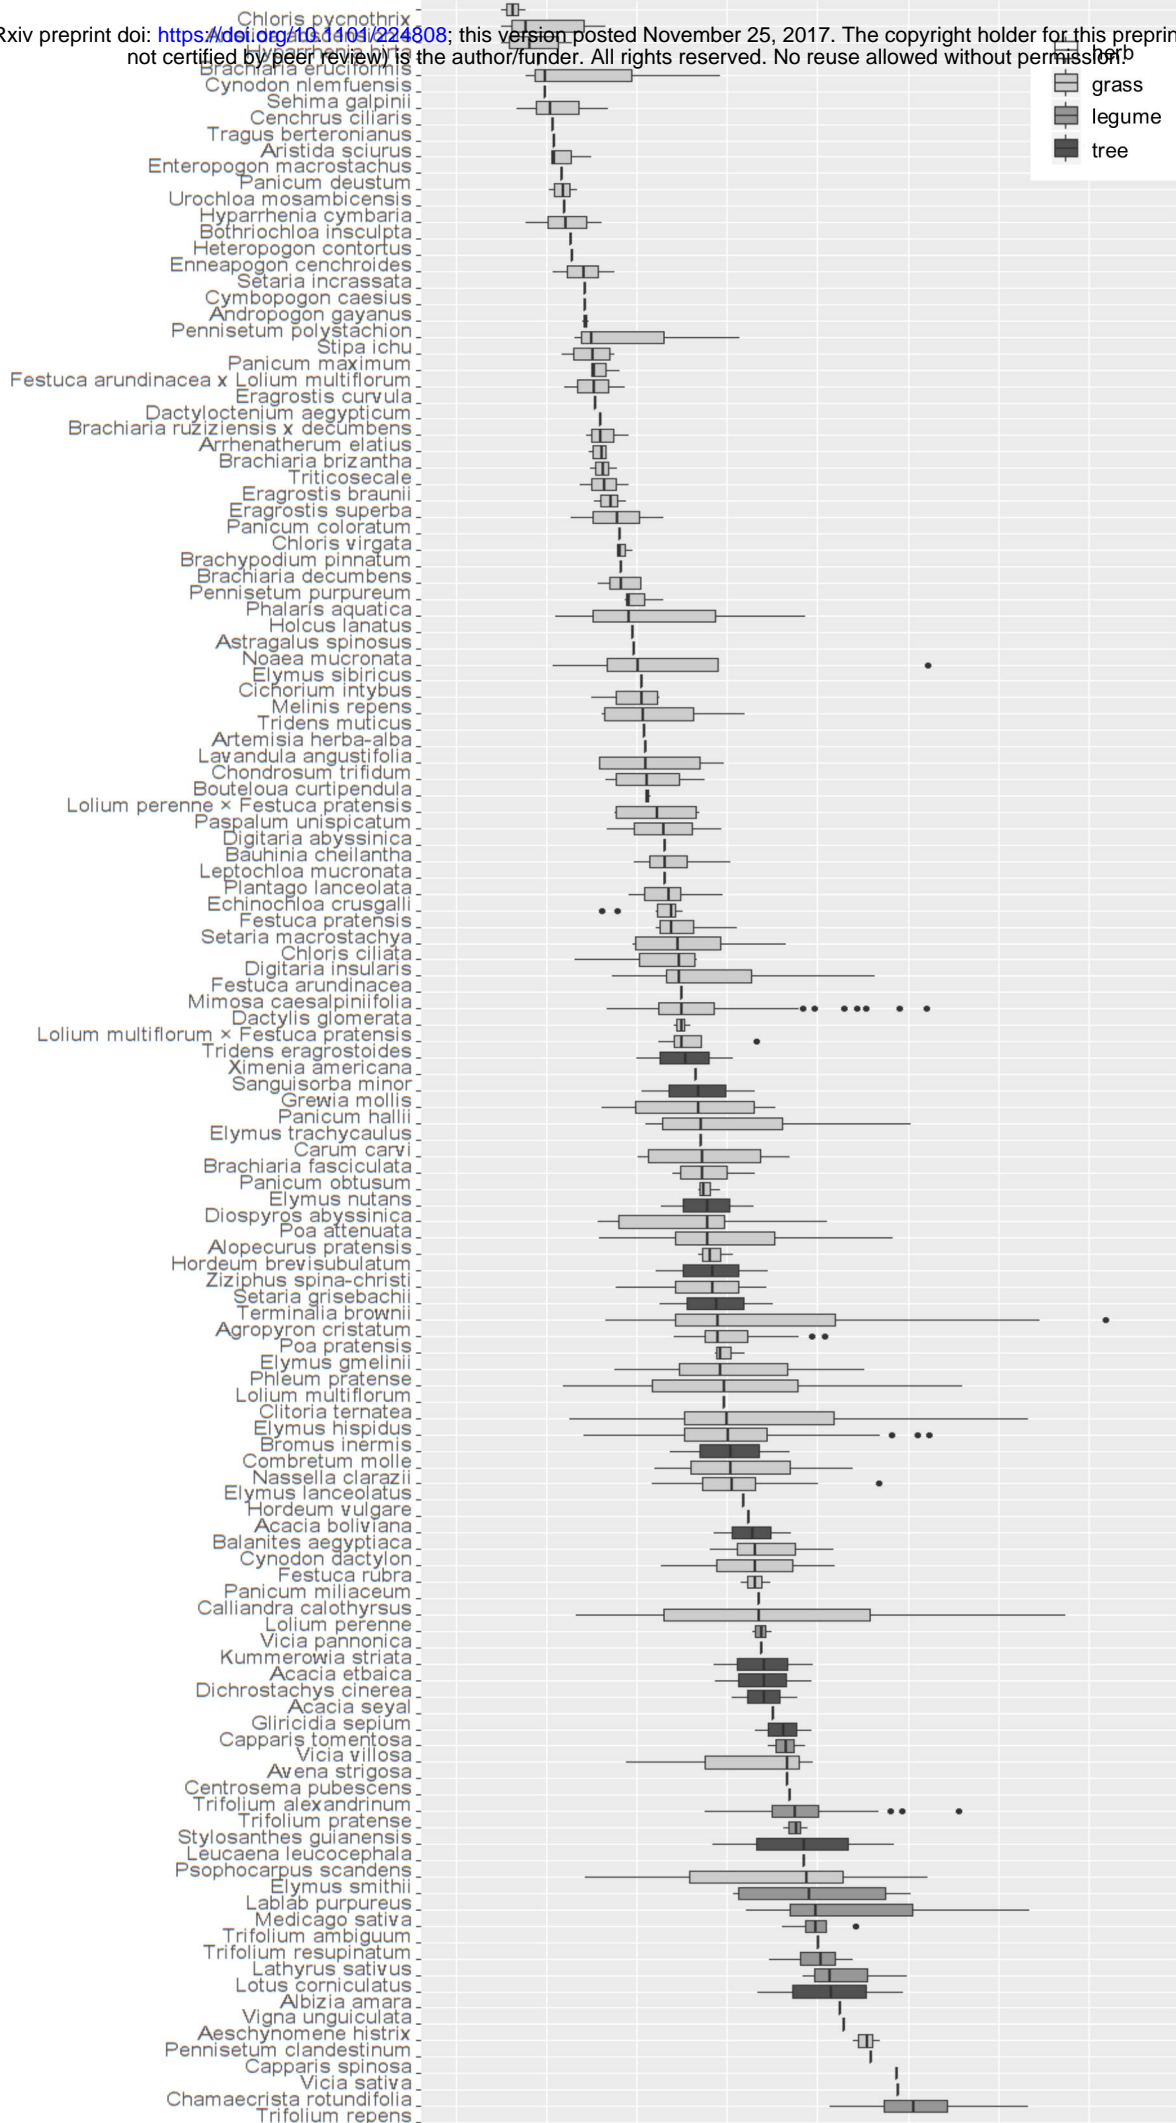

Source: https://www.biorxiv.org/content/10.1101/224808v1.full.pdf
